# Supplementary material for: The Effects of Growth Modification on Pollen Development in Spring Barley (Hordeum vulgare L.) Genotypes with Contrasting Drought Tolerance
Source: MDPI journal article supplement (doi:10.3390/cells12121656), 2023-06-18
Supplement: s1 [file s1]

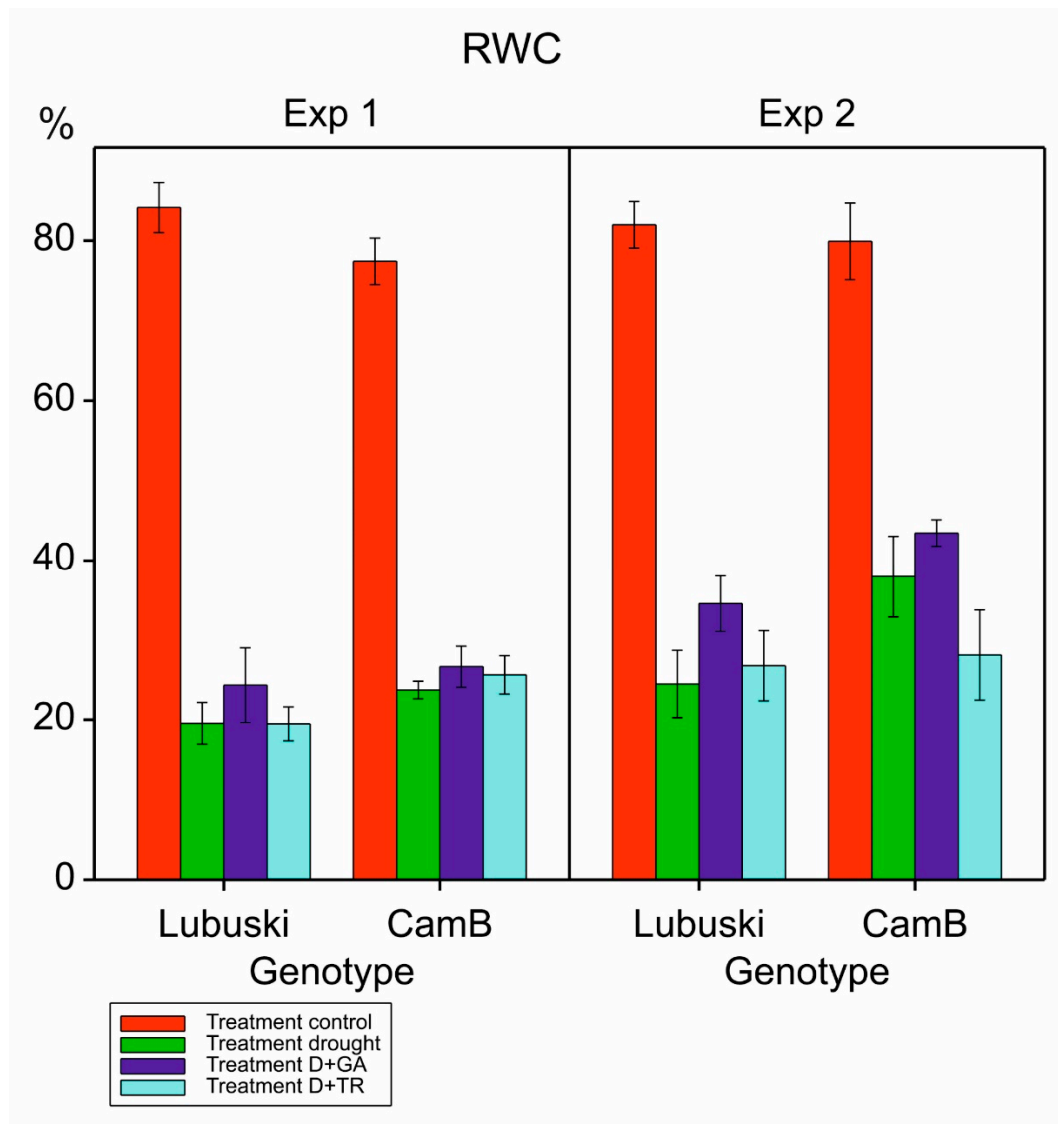

Supplementary Figure S3. Means values (with standard errors) of RWC recorded for two contrasting genotypes in different water regimes in both type of experiments.
