# Supplementary material for: The Effects of Growth Modification on Pollen Development in Spring Barley (Hordeum vulgare L.) Genotypes with Contrasting Drought Tolerance
Source: MDPI journal article supplement (doi:10.3390/cells12121656), 2023-06-18
Supplement: s1 [file s1]

Supplementary Table S4. Results of analysis of variance for observed traits (P values for testing significance of variation sources).

| Group of traits          | Trait     | Experiment 1 (Exp 1) |               |                        |                   |        |        | Experiment 2 (Exp 2) |               |                        |                   |         |        |
|--------------------------|-----------|----------------------|---------------|------------------------|-------------------|--------|--------|----------------------|---------------|------------------------|-------------------|---------|--------|
|                          |           | Genotype (G)         | Treatment (T) | Development point (DP) | G × T interaction | G × DP | T × DP | Genotype (G)         | Treatment (T) | Development point (DP) | G × T interaction | G × DP  | T × DP |
| Phenology                | Tillering | 0.003                | 0.500         | -                      | -                 | -      | -      | 0.003                | 0.500         | -                      | -                 | -       | -      |
|                          | Flag leaf | < 0.001              | 0.500         | -                      | -                 | -      | -      | < 0.001              | 0.500         | -                      | -                 | -       | -      |
|                          | Flowering | < 0.001              | 0.500         | -                      | -                 | -      | -      | < 0.001              | 0.500         | -                      | -                 | -       | -      |
|                          | Heading   | 0.004                | 0.082         | -                      | -                 | -      | -      | 0.014                | 0.187         | -                      | -                 | -       | -      |
| Phenotype                | Tn        | 0.819                | < 0.001       | -                      | 0.044             | -      | -      | 0.242                | < 0.001       | -                      | < 0.001           | -       | -      |
|                          | PTn       | < 0.001              | < 0.001       | -                      | 0.001             | -      | -      | 0.418                | 0.001         | -                      | < 0.001           | -       | -      |
|                          | LSm       | < 0.001              | < 0.001       | -                      | < 0.001           | -      | -      | < 0.001              | 0.001         | -                      | 0.007             | -       | -      |
|                          | NSSm      | < 0.001              | 0.003         | -                      | < 0.001           | -      | -      | < 0.001              | 0.002         | -                      | 0.038             | -       | -      |
|                          | NGSm      | < 0.001              | < 0.001       | -                      | < 0.001           | -      | -      | < 0.001              | 0.015         | -                      | < 0.001           | -       | -      |
|                          | WGSm      | < 0.001              | < 0.001       | -                      | < 0.001           | -      | -      | < 0.001              | < 0.001       | -                      | < 0.001           | -       | -      |
|                          | LSI       | < 0.001              | < 0.001       | -                      | 0.195             | -      | -      | < 0.001              | 0.002         | -                      | 0.184             | -       | -      |
|                          | NSSI      | < 0.001              | 0.001         | -                      | 0.234             | -      | -      | < 0.001              | < 0.001       | -                      | < 0.001           | -       | -      |
|                          | NGSI      | 0.002                | < 0.001       | -                      | 0.007             | -      | -      | 0.480                | 0.020         | -                      | < 0.001           | -       | -      |
|                          | WGSi      | 0.087                | < 0.001       | -                      | < 0.001           | -      | -      | 0.049                | 0.021         | -                      | < 0.001           | -       | -      |
|                          | GY        | 0.514                | < 0.001       | -                      | < 0.001           | -      | -      | 0.733                | 0.001         | -                      | < 0.001           | -       | -      |
|                          | TGW       | 0.541                | < 0.001       | -                      | 0.053             | -      | -      | 0.016                | < 0.001       | -                      | < 0.001           | -       | -      |
|                          | FSm       | 0.284                | < 0.001       | -                      | < 0.001           | -      | -      | 0.013                | 0.115         | -                      | 0.015             | -       | -      |
|                          | FSI       | 0.224                | < 0.001       | -                      | 0.003             | -      | -      | < 0.001              | 0.041         | -                      | < 0.001           | -       | -      |
| Chlorophyll fluorescence | ABS_RC    | < 0.001              | 0.051         | < 0.001                | 0.162             | 0.879  | 0.208  | < 0.001              | < 0.001       | < 0.001                | < 0.001           | < 0.001 | 0.893  |
|                          | TRo_RC    | < 0.001              | 0.049         | < 0.001                | 0.074             | 0.816  | 0.454  | < 0.001              | < 0.001       | < 0.001                | < 0.001           | 0.001   | 0.974  |
|                          | ETo_RC    | < 0.001              | < 0.001       | 0.004                  | < 0.001           | 0.065  | 0.002  | < 0.001              | < 0.001       | < 0.001                | 0.113             | < 0.001 | 0.045  |
|                          | DIo_RC    | < 0.001              | 0.051         | < 0.001                | 0.150             | 0.986  | 0.014  | 0.011                | < 0.001       | < 0.001                | < 0.001           | < 0.001 | 0.455  |

|                         |                |         |         |         |         |       |         |         |         |         |         |         |       |
|-------------------------|----------------|---------|---------|---------|---------|-------|---------|---------|---------|---------|---------|---------|-------|
|                         | Fv_Fm          | 0.446   | 0.294   | < 0.001 | 0.034   | 0.810 | 0.036   | 0.295   | < 0.001 | < 0.001 | 0.001   | < 0.001 | 0.063 |
|                         | Ψ_o            | 0.005   | < 0.001 | < 0.001 | < 0.001 | 0.335 | 0.001   | < 0.001 | < 0.001 | < 0.001 | 0.009   | < 0.001 | 0.006 |
|                         | φ_Eo           | 0.002   | < 0.001 | < 0.001 | < 0.001 | 0.502 | 0.005   | < 0.001 | 0.001   | < 0.001 | 0.001   | 0.079   | 0.002 |
|                         | φ_Do           | 0.026   | 0.013   | < 0.001 | 0.059   | 0.997 | < 0.001 | 0.457   | < 0.001 | < 0.001 | < 0.001 | < 0.001 | 0.238 |
|                         | Pi_Abs         | < 0.001 | < 0.001 | < 0.001 | 0.003   | 0.597 | 0.019   | < 0.001 | < 0.001 | < 0.001 | < 0.001 | < 0.001 | 0.260 |
| RWC                     |                | 0.470   | < 0.001 | -       | 0.132   | -     | -       | 0.076   | < 0.001 | -       | 0.253   | -       | -     |
| Anther morphology       | Length         | < 0.001 | < 0.001 | -       | 0.1372  | -     | -       | 1       | < 0.001 | -       | 0.4106  | -       | -     |
|                         | Width          | 1       | < 0.001 | -       | < 0.001 | -     | -       | < 0.001 | < 0.001 | -       | < 0.001 | -       | -     |
| Pollen grain morphology | Area           | 0.682   | < 0.001 | -       | < 0.001 | -     | -       | < 0.001 | < 0.001 | -       | < 0.001 | -       | -     |
|                         | Perimeter      | 0.270   | < 0.001 | -       | < 0.001 | -     | -       | < 0.001 | < 0.001 | -       | < 0.001 | -       | -     |
|                         | Width          | 0.930   | < 0.001 | -       | < 0.001 | -     | -       | < 0.001 | < 0.001 | -       | < 0.001 | -       | -     |
|                         | Length         | 0.193   | < 0.001 | -       | < 0.001 | -     | -       | < 0.001 | < 0.001 | -       | < 0.001 | -       | -     |
| Pollen viability        | Method 1 (Pv1) | 0.027   | < 0.001 | -       | 0.001   | -     | -       | < 0.001 | < 0.001 | -       | < 0.001 | -       | -     |
|                         | Method 2 (Pv2) | 0.170   | < 0.001 | -       | < 0.001 | -     | -       | 0.409   | < 0.001 | -       | < 0.001 | -       | -     |
| GAMYB expression        | LFE1           | 0.004   | 0.010   | -       | 0.024   | -     | -       | 0.901   | 0.678   | -       | 0.247   | -       | -     |
|                         | LFE3           | 0.019   | 0.015   | -       | <0.001  | -     | -       | 0.594   | 0.171   | -       | 0.665   | -       | -     |
