# Supplementary material for: The Effects of Growth Modification on Pollen Development in Spring Barley (Hordeum vulgare L.) Genotypes with Contrasting Drought Tolerance
Source: MDPI journal article supplement (doi:10.3390/cells12121656), 2023-06-18
Supplement: s1 [file s1]

Supplementary Table S2. The dates of sample collection for microscopic observation conducted in both experiments (Exp 1 and Exp 2). Treatments: C – control condition; D – drought condition; D+GA - drought condition combined with GA3 application; D+TR - drought condition combined with Trinexapac application. NoD – number of days, the first day is the day of droughts beginning. The number of days NoD<sub>1</sub>, NoD<sub>2</sub> and NoD<sub>3</sub> refer to the appearance of the LFE1, LFE3 and LFE4 stages, respectively, starting from flag leaf stage (drought start).

| Genotype | Treatment | Exp 1            |                  |                  | Exp 2            |                  |                  |
|----------|-----------|------------------|------------------|------------------|------------------|------------------|------------------|
|          |           | NoD <sub>1</sub> | NoD <sub>2</sub> | NoD <sub>3</sub> | NoD <sub>1</sub> | NoD <sub>2</sub> | NoD <sub>3</sub> |
| CamB     | C         | 2                | 5                | 7                | 6                | 11               | 16               |
|          | D         | 3                | 6                | 9                | 7                | 13               | 17               |
|          | D+GA      | 2                | 4                | 5                | 3                | 7                | 8                |
|          | D+TR      | 4                | 8                | 11               | 7                | 14               | 20               |
| Lubuski  | C         | 5                | 10               | 12               | 8                | 20               | 24               |
|          | D         | 6                | 11               | 14               | 9                | 20               | 25               |
|          | D+GA      | 5                | 8                | 12               | 8                | 15               | 19               |
|          | D+TR      | 7                | 12               | 17               | 9                | 22               | 27               |
