# Supplementary material for: The Effects of Growth Modification on Pollen Development in Spring Barley (Hordeum vulgare L.) Genotypes with Contrasting Drought Tolerance
Source: MDPI journal article supplement (doi:10.3390/cells12121656), 2023-06-18
Supplement: s1 [file s1]

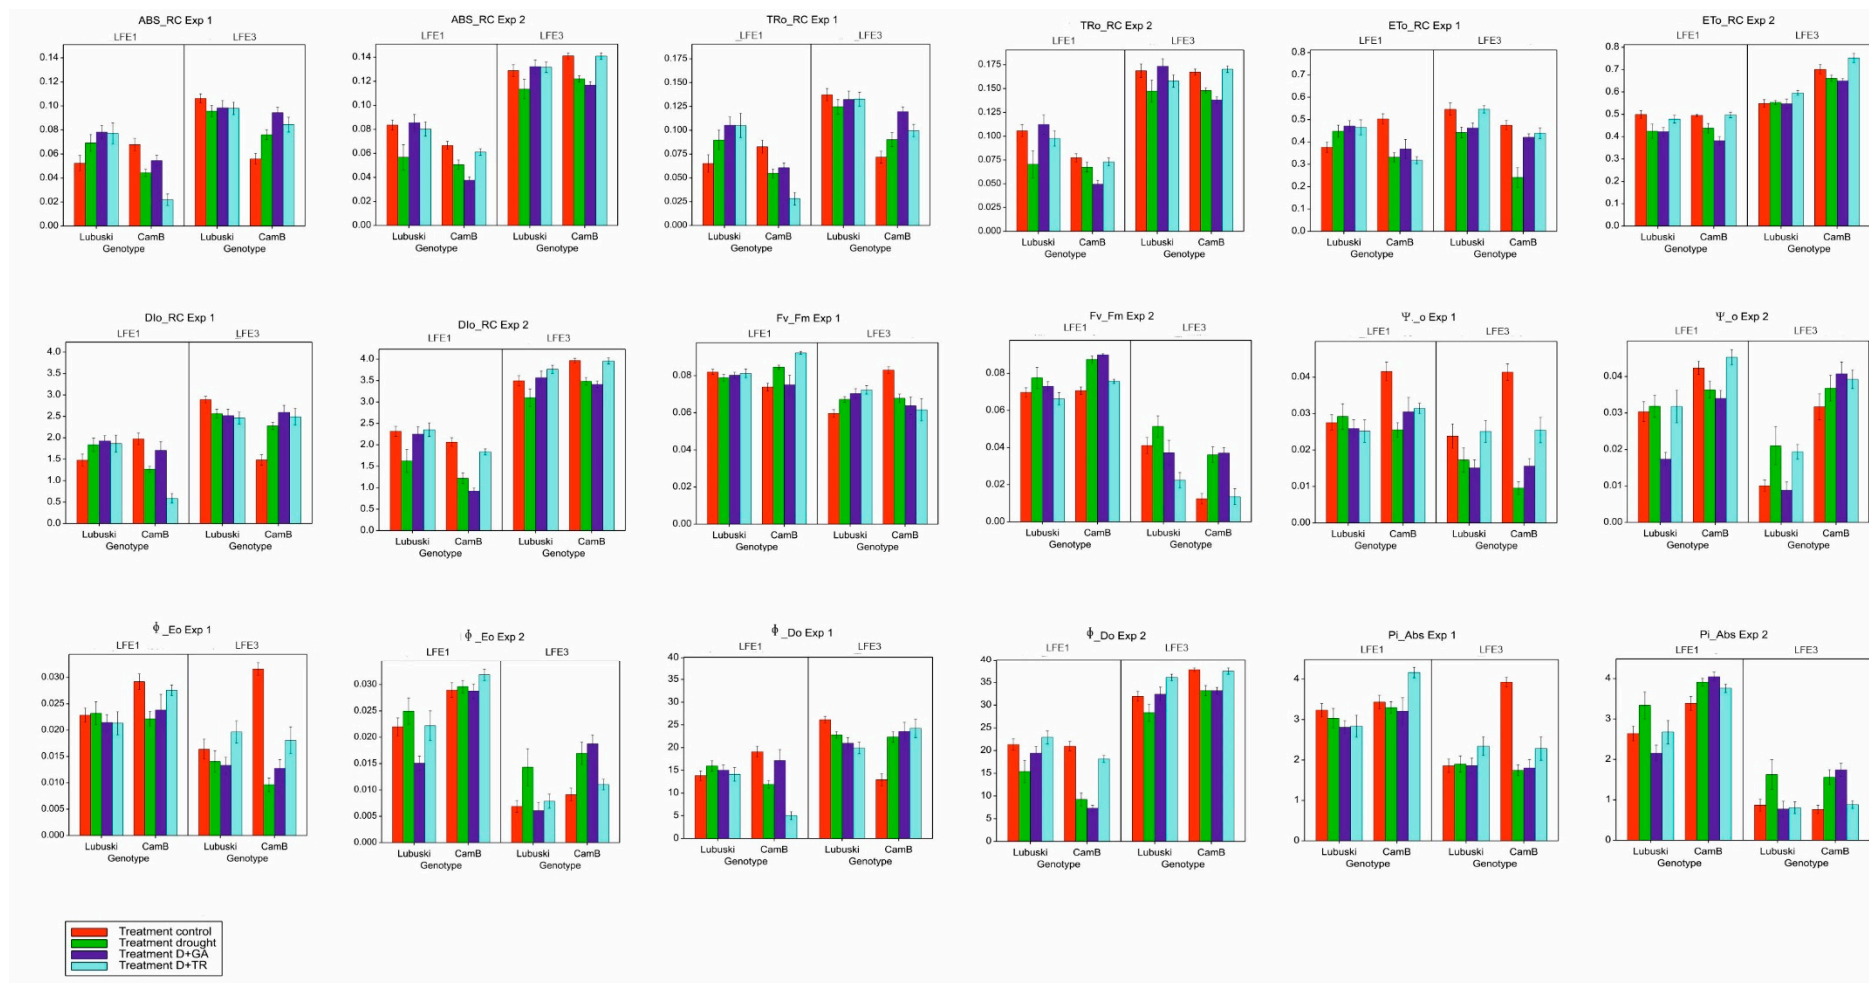

Supplementary Figure S2. Mean values (with standard errors) recorded for chlorophyll fluorescence parameters in both type of experiments at two development points (LFE1 and LFE3).
