# Supplementary material for: The Effects of Growth Modification on Pollen Development in Spring Barley (Hordeum vulgare L.) Genotypes with Contrasting Drought Tolerance
Source: MDPI journal article supplement (doi:10.3390/cells12121656), 2023-06-18
Supplement: s1 [file s1]

Supplementary Table S1. Crop growth and development stages according to the Zadoks scale.

| Primary growth stages       | Name of the secondary stages                                                                                                                                                                                                                                                                                                                          |
|-----------------------------|-------------------------------------------------------------------------------------------------------------------------------------------------------------------------------------------------------------------------------------------------------------------------------------------------------------------------------------------------------|
| 0 - Germination             | 00 - Dry seed<br>01 - Start of water absorption<br>03 - Seed fully swollen<br>05 - First root emerged from seed<br>07 - Coleoptile emerged from seed<br>09 - First green leaf just at tip of coleoptile                                                                                                                                               |
| 1 - Seedling growth         | 0 - First leaf through coleoptile<br>11 - First leaf emerged<br>12 - Two leaves emerged<br>13 - Three leaves emerged<br>14 - Four leaves emerged<br>15 - Five leaves emerged<br>16 - Six leaves emerged<br>17 - Seven leaves emerged<br>18 - Eight leaves emerged<br>19 - Nine or more leaves emerged                                                 |
| 2 - Tillering               | 20 - Main stem only<br>21 - Main stem and one tiller<br>22 - Main stem and two tillers<br>23 - Main stem and three tillers<br>24 - Main stem and four tillers<br>25 - Main stem and five tillers<br>26 - Main stem and six tillers<br>27 - Main stem and seven tillers<br>28 - Main stem and eight tillers<br>29 - Main stem and nine or more tillers |
| 3 - Stem elongation         | 30 - Pseudostem (youngest leaf sheath erection)<br>31 - First node detectable<br>32 - Second node detectable<br>33 - Third node detectable<br>34 - Fourth node detectable<br>35 - Fifth node detectable<br>36 - Sixth node detectable<br>37 - Flag leaf just visible<br>39 - Flag leaf ligule just visible                                            |
| 4 - Booting                 | 41 - Flag leaf sheath extending<br>43 - Boots just visible swollen<br>45 - Boots swollen<br>47 - Flag leaf sheath opening<br>49 - First awns visible                                                                                                                                                                                                  |
| 5 - Ear emergence from boot | 51 - Tip of ear just visible<br>53 - Ear quarter emerged<br>55 - Ear half emerged<br>57 - Ear three quarters emerged                                                                                                                                                                                                                                  |

|                       |                                                                            |
|-----------------------|----------------------------------------------------------------------------|
|                       | 59 - Ear emergence complete                                                |
| 6 - Anthesis          | 61 - Beginning of anthesis (few anthers at middle of ear)                  |
|                       | 65 - Anthesis half-way (anthers occurring half way to tip and base of ear) |
|                       | 69 - Anthesis complet                                                      |
| 7 - Milk development  | 71 - Kernel water ripe                                                     |
|                       | 73 - Early milk                                                            |
|                       | 75 - Medium milk                                                           |
|                       | 77 - Late milk                                                             |
| 8 - Dough development | 83 - Early dough                                                           |
|                       | 85 - Soft dough                                                            |
|                       | 87 - Hard dough                                                            |
| 9 - Ripening          | 91 - Grain hard, difficult to divide                                       |
|                       | 92 - Grain hard, not dented by thumbnail                                   |
|                       | 93 - Grain loosening in daytime                                            |
|                       | 94 - Over-ripe straw dead and collapsing                                   |
|                       | 95 - Seed dormant                                                          |
|                       | 96 - Viable seed giving 50% germination                                    |
|                       | 97 - Seed not dormant                                                      |
|                       | 98 - Secondary dormancy induced                                            |
|                       | 99 - Secondary dormancy lost                                               |
