# Supplementary material for: The Effects of Growth Modification on Pollen Development in Spring Barley (Hordeum vulgare L.) Genotypes with Contrasting Drought Tolerance
Source: MDPI journal article supplement (doi:10.3390/cells12121656), 2023-06-18
Supplement: s1 [file s1]

Supplementary Table S3. DNA sequences of the gene specific primers.

| Gene           | Sequence (5'→3')          | Ampl.<br>length<br>(bp) | Melt<br>temp.<br>[°C] | E [%] |
|----------------|---------------------------|-------------------------|-----------------------|-------|
| <i>HvGAMYB</i> | F: CCTTCACTCCAAGATACCGAAT | 89                      | 63                    | 108.3 |
|                | R: GGATCAACCAACTCCGTAGG   |                         | 63                    |       |
| <i>ACT1</i>    | F: GCCGTGCTTTCCTCTATG     | 235                     | 63                    | 101.8 |
|                | R: GCTTCTCCTTGATGTCCCTTA  |                         | 63                    |       |
| <i>UBI</i>     | F: TCGCCGTCCTCCAGTTCTAC   | 63                      | 63                    | 105.1 |
|                | R: CCTTCCTGAGCCTGGTTACCT  |                         | 63                    |       |
| <i>UPL</i>     | F: CTGAAGAGTTAGGCGGGAAA   | 100                     | 63                    | 105.8 |
|                | R: ATCGCATGAACGTAGTGCAA   |                         | 63                    |       |
