# Supplementary figures and images for: The Effects of Growth Modification on Pollen Development in Spring Barley (Hordeum vulgare L.) Genotypes with Contrasting Drought Tolerance
Source: MDPI journal article supplement (doi:10.3390/cells12121656), 2023-06-18

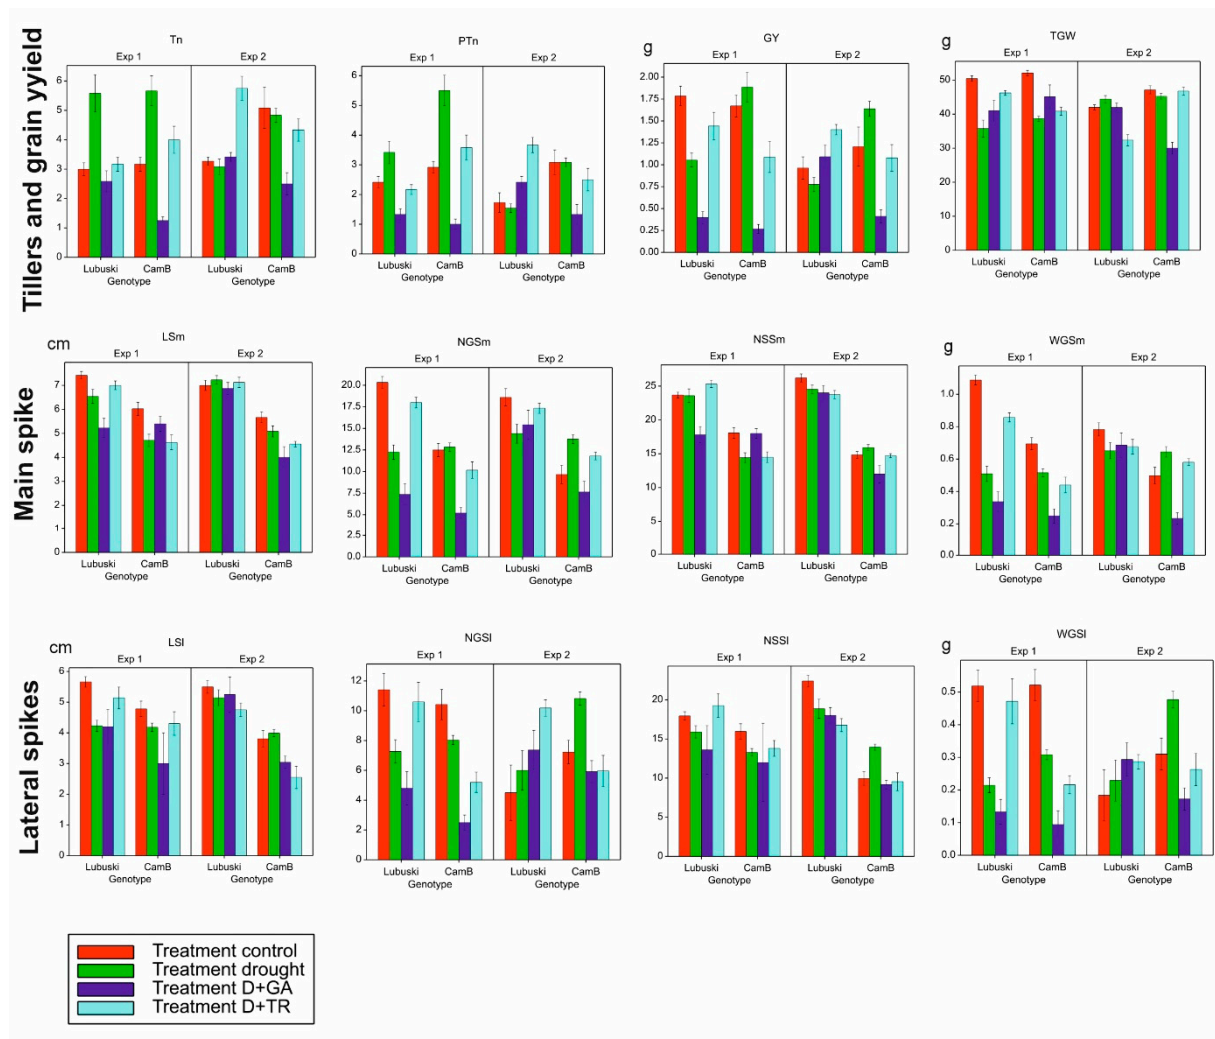

Supplementary Figure S1. Mean values of yield-related traits (with standard errors).

Supplement: s1 [file s1]
